# Supplementary material for: High-throughput analysis of the human thymic Vδ1+ T cell receptor repertoire
Source: PubMed Central journal article supplement (PMC6609709; doi:10.1038/s41597-019-0118-2), 2019-07-04
Supplement: 41597_2019_118_MOESM2_ESM.pdf [file 41597_2019_118_MOESM2_ESM.pdf]

**This supplementary file includes examples of the Vδ1 and Vδ2 alignments obtained with IMGT.**

IMGT/V-QUEST program version: 3.4.15; IMGT/V-QUEST reference directory release: 201851-4

|                                      |                          |
|--------------------------------------|--------------------------|
| Species:                             | <b>Homo sapiens</b>      |
| Receptor type or locus:              | <b>TRD</b>               |
| IMGT directory reference set:        | <b>F+ORF+ in-frame P</b> |
| Search for insertions and deletions: | <b>no</b>                |

### Sequence: 13

Analysed sequence length:185.

Sequence analysis category: 1 (no indel search)

Sequence compared with the *Homo sapiens* (human) TR set from the IMGT reference directory

>3

```
tcaagaaagcagcgaatccgctgccttaaccattcagccttgagctagaagattcag  
caaagtactttgtgctcttggggccgaccccggaatccaccggtaaattcgtgttg  
gcacaagttccactgttactctgtccctgtaaatacagactcgtaactccttcggtt  
ttgtc
```

|                                                                                                       |                                                                                  |                  |                                     |
|-------------------------------------------------------------------------------------------------------|----------------------------------------------------------------------------------|------------------|-------------------------------------|
| <b>Result summary:</b>                                                                                | <b>Productive TRD rearranged sequence:</b> (no stop codon and in-frame junction) |                  |                                     |
| V-GENE and allele                                                                                     | Homsap<br>TRDV1*01 F                                                             | score =<br>356   | identity = <b>98.65%</b> (73/74 nt) |
| J-GENE and allele                                                                                     | Homsap<br>TRDJ1*01 F                                                             | score =<br>84    | identity = 62.75% (32/51 nt)        |
| D-GENE and allele by<br>IMGT/JunctionAnalysis<br>FR-IMGT lengths, CDR-IMGT<br>lengths and AA JUNCTION | Homsap<br>TRDD1*01 F<br><br>[X.X.24.11]                                          | <br><br>[X.X.14] | <br><br>CALGGRPRQSTGKFVF            |

V-REGION partial 5' missing nt nb: **199**

## Sequence: 2 5

Analysed sequence length:185.

Sequence analysis category: 1 (no indel search)

Sequence compared with the *Homo sapiens* (human) TR set from the IMGT reference directory

>5

```
tcaagaaagcagcgaatccgtcgccttaaccattcagccttacagctagaagattcag  
caaagtactttgtgctcttgggggacggggtccggcgtacaccgataaactcatctttg  
gaaaaggaacccgtgtgactgtggaaccaa gaagtcagcctcataccaaccatccgtt  
ttgtc
```

|                                                                                                       |                                                                                  |                  |                                      |
|-------------------------------------------------------------------------------------------------------|----------------------------------------------------------------------------------|------------------|--------------------------------------|
| <b>Result summary:</b>                                                                                | <b>Productive TRD rearranged sequence:</b> (no stop codon and in-frame junction) |                  |                                      |
| V-GENE and allele                                                                                     | Homsap<br>TRDV1*01 F                                                             | score =<br>365   | identity = <b>100.00%</b> (74/74 nt) |
| J-GENE and allele                                                                                     | Homsap<br>TRDJ1*01 F                                                             | score =<br>255   | identity = 100.00% (51/51 nt)        |
| D-GENE and allele by<br>IMGT/JunctionAnalysis<br>FR-IMGT lengths, CDR-IMGT<br>lengths and AA JUNCTION | Homsap<br>TRDD3*01 F<br><br>[X.X.24.11]                                          | <br><br>[X.X.14] | <br><br>CALGGRGPAYTDKLIF             |

V-REGION partial 5' missing nt nb: **199**

## Sequence: 39

Analysed sequence length:194.

Sequence analysis category: 1 (no indel search)

Sequence compared with the *Homo sapiens* (human) TR set from the IMGT reference directory

>9

```
ttagaagcagcgaatccgctgccttaaccattcagccttacagctagaagattcag  
caaagtacttctgtgctcttgggaactcctactattctactgggatacaccgataaac  
tcacctttgaaaaggaaccgtgtgactgtggaaccaaagaagtcagcctcataccaaac  
cttccgtttttgtc
```

|                                                      |                                                                                  |                |                                     |
|------------------------------------------------------|----------------------------------------------------------------------------------|----------------|-------------------------------------|
| <b>Result summary:</b>                               | <b>Productive TRD rearranged sequence:</b> (no stop codon and in-frame junction) |                |                                     |
| V-GENE and allele                                    | Homsap TRDV1*01 F                                                                | score =<br>347 | identity = <b>97.30%</b> (72/74 nt) |
| J-GENE and allele                                    | Homsap TRDJ1*01 F                                                                | score =<br>255 | identity = 100.00% (51/51 nt)       |
| D-GENE and allele by<br>IMGT/JunctionAnalysis        | Homsap TRDD2*01 F<br>and Homsap<br>TRDD3*01 F                                    |                |                                     |
| FR-IMGT lengths, CDR-IMGT<br>lengths and AA JUNCTION | [X.X.24.11]                                                                      | [X.X.1<br>7]   | CALGELLIFYWGYTDKLIF                 |

V-REGION partial 5' missing nt nb: **199**

## Sequence: 4 6

Analysed sequence length:195.

Sequence analysis category: 1 (no indel search)

Sequence compared with the *Homo sapiens* (human) TR set from the IMGT reference directory

>6

```
ttgcaaagcacctggctgtacttaagatactgcaccatcagagagatgaagggtct  
tactactgtcccgtgacactaagccagaagagaggggcctgtgtcctacaccgataaa  
ctcatcttgaaaaggaaccgtgtgactgtggaaccaagaaggcagcctcataccaa  
ccatcccgtttgtc
```

|                                                          |                                                                                  |                |                                     |
|----------------------------------------------------------|----------------------------------------------------------------------------------|----------------|-------------------------------------|
| <b>Result summary:</b>                                   | <b>Productive TRD rearranged sequence:</b> (no stop codon and in-frame junction) |                |                                     |
| V-GENE and allele                                        | Homsap TRDV2*01 F, or<br>Homsap TRDV2*02 F or<br>Homsap TRDV2*03 F               | score =<br>322 | identity = <b>97.10%</b> (67/69 nt) |
| J-GENE and allele                                        | Homsap TRDJ1*01 F                                                                | score =<br>255 | identity = 100.00% (51/51 nt)       |
| D-GENE and allele by<br>IMGT/JunctionAnalysis            | Homsap TRDD3*01 F                                                                |                |                                     |
| FR-IMGT lengths, CDR-<br>IMGT lengths and AA<br>JUNCTION | [X.X.23.11]                                                                      | [X.X.1<br>9]   | CARDTKPEERGPVSYTDKLIF               |

V-REGION partial 5' missing nt nb: **207**

## Sequence: 5 10

Analysed sequence length:191.

Sequence analysis category: 1 (no indel search)

Sequence compared with the *Homo sapiens* (human) TR set from the IMGT reference directory

>10

```
tcaagaaagcagcgaatccgtgccttaaccattcagccttacagctagaagattcag  
caaagtactttgtgctcttggggcaattgccgggggataccttacaccaataaactca  
tctttgaaaaggaaccgtgtgactgtggaaccaagaagtcagcctcataccaaacat  
ccgttttgc
```

|                                                                                                       |                                                                                  |                |                                     |
|-------------------------------------------------------------------------------------------------------|----------------------------------------------------------------------------------|----------------|-------------------------------------|
| <b>Result summary:</b>                                                                                | <b>Productive TRD rearranged sequence:</b> (no stop codon and in-frame junction) |                |                                     |
| V-GENE and allele                                                                                     | Homsap<br>TRDV1*01 F                                                             | score =<br>356 | identity = <b>98.65%</b> (73/74 nt) |
| J-GENE and allele                                                                                     | Homsap<br>TRDJ1*01 F                                                             | score =<br>246 | identity = 98.04% (50/51 nt)        |
| D-GENE and allele by<br>IMGT/JunctionAnalysis<br>FR-IMGT lengths, CDR-IMGT<br>lengths and AA JUNCTION | Homsap<br>TRDD3*01 F<br>[X.X.24.11]                                              | [X.X.16]       | CALGAIARGIPYTNKLIF                  |

V-REGION partial 5' missing nt nb: **199**

## Sequence: 6 33

Analysed sequence length:180.

Sequence analysis category: 1 (no indel search)

Sequence compared with the *Homo sapiens* (human) TR set from the IMGT reference directory

>33

```
attgcaagaacctggctgtacttaagatactgcaccatcagagagatgaagggtct  
tactactgtgctgtgacctggaggggtcggaccaccgataaactcatcttgaaaa  
ggaacccgtgtgactgtggaaccaaagaagtcagcctcataccaaccatccgttttgc
```

|                                                   |                                                                                  |             |                                      |
|---------------------------------------------------|----------------------------------------------------------------------------------|-------------|--------------------------------------|
| <b>Result summary:</b>                            | <b>Productive TRD rearranged sequence:</b> (no stop codon and in-frame junction) |             |                                      |
| V-GENE and allele                                 | Homsap TRDV2*01 F, or<br>Homsap TRDV2*02 F or<br>Homsap TRDV2*03 F               | score = 340 | identity = <b>100.00%</b> (69/69 nt) |
| J-GENE and allele                                 | Homsap TRDJ1*01 F                                                                | score = 246 | identity = 98.04% (50/51 nt)         |
| D-GENE and allele by IMGT/JunctionAnalysis        | Homsap TRDD3*01 F                                                                |             |                                      |
| FR-IMGT lengths, CDR-IMGT lengths and AA JUNCTION | [X.X.23.11]                                                                      | [X.X.14]    | CACDTGGGRTTDKLIF                     |

V-REGION partial 5' missing nt nb: **207**

**Sequence: 7 46**

Analysed sequence length:186.

Sequence analysis category: 1 (no indel search)

Sequence compared with the *Homo sapiens* (human) TR set from the IMGT reference directory

&gt;46

```
attgcaaagaacctggctgtacttaagatactgcaccatcagagagatgaagggtct
tactactgtcctgtgacacccgtactggggacaccgaacgtacgataaactcatctt
ggaaaaggaaccgtgtgactgtggaaccaaagaagtcagcctcataccacccatccgtt
tttgc
```

|                                                          |                                                                                  |                |                                      |
|----------------------------------------------------------|----------------------------------------------------------------------------------|----------------|--------------------------------------|
| <b>Result summary:</b>                                   | <b>Productive TRD rearranged sequence:</b> (no stop codon and in-frame junction) |                |                                      |
| V-GENE and allele                                        | Homsap TRDV2*01 F, or<br>Homsap TRDV2*02 F or<br>Homsap TRDV2*03 F               | score =<br>340 | identity = <b>100.00%</b> (69/69 nt) |
| J-GENE and allele                                        | Homsap TRDJ1*01 F                                                                | score =<br>219 | identity = 92.16% (47/51 nt)         |
| D-GENE and allele by<br>IMGT/JunctionAnalysis            | Homsap TRDD3*01 F                                                                |                |                                      |
| FR-IMGT lengths, CDR-<br>IMGT lengths and AA<br>JUNCTION | [X.X.23.11]                                                                      | [X.X.1<br>6]   | CACDTRTGGHRTYDKLIF                   |

V-REGION partial 5' missing nt nb: 207



**Sequence: 8 48**

Analysed sequence length:174.

Sequence analysis category: 1 (no indel search)

Sequence compared with the *Homo sapiens* (human) TR set from the IMGT reference directory

>48

```
attgcaagaacctggctgtacttaagatacttgaccatcagagagatgaagggtct
tactactgtcctgtgacgccaagggtgacaccgataaactcatcttggaaaaggaacc
cgtgtgactgtggaaccaagaagtcagcctcatacacaacccatccgttttgtc
```

|                                                          |                                                                                  |                |                                         |
|----------------------------------------------------------|----------------------------------------------------------------------------------|----------------|-----------------------------------------|
| <b>Result summary:</b>                                   | <b>Productive TRD rearranged sequence:</b> (no stop codon and in-frame junction) |                |                                         |
| V-GENE and allele                                        | Homsap TRDV2*01 F, or<br>Homsap TRDV2*02 F or<br>Homsap TRDV2*03 F               | score =<br>340 | identity = <b>100.00%</b><br>(69/69 nt) |
| J-GENE and allele                                        | Homsap TRDJ1*01 F                                                                | score =<br>255 | identity = 100.00%<br>(51/51 nt)        |
| FR-IMGT lengths, CDR-<br>IMGT lengths and AA<br>JUNCTION | [X.X.23.11]                                                                      | [X.X.1<br>2]   | CACDAKVYTDKLIF                          |

V-REGION partial 5' missing nt nb: **207**
